# Supplementary material for: The pro-inflammatory phenotype of the human non-classical monocyte subset is attributed to senescence
Source: PubMed Central journal article supplement (PMC5833376; doi:10.1038/s41419-018-0327-1), 2018-02-15
Supplement: 41419_2018_327_MOESM1_ESM.pdf [file 41419_2018_327_MOESM1_ESM.pdf]

Supplementary Figure S1

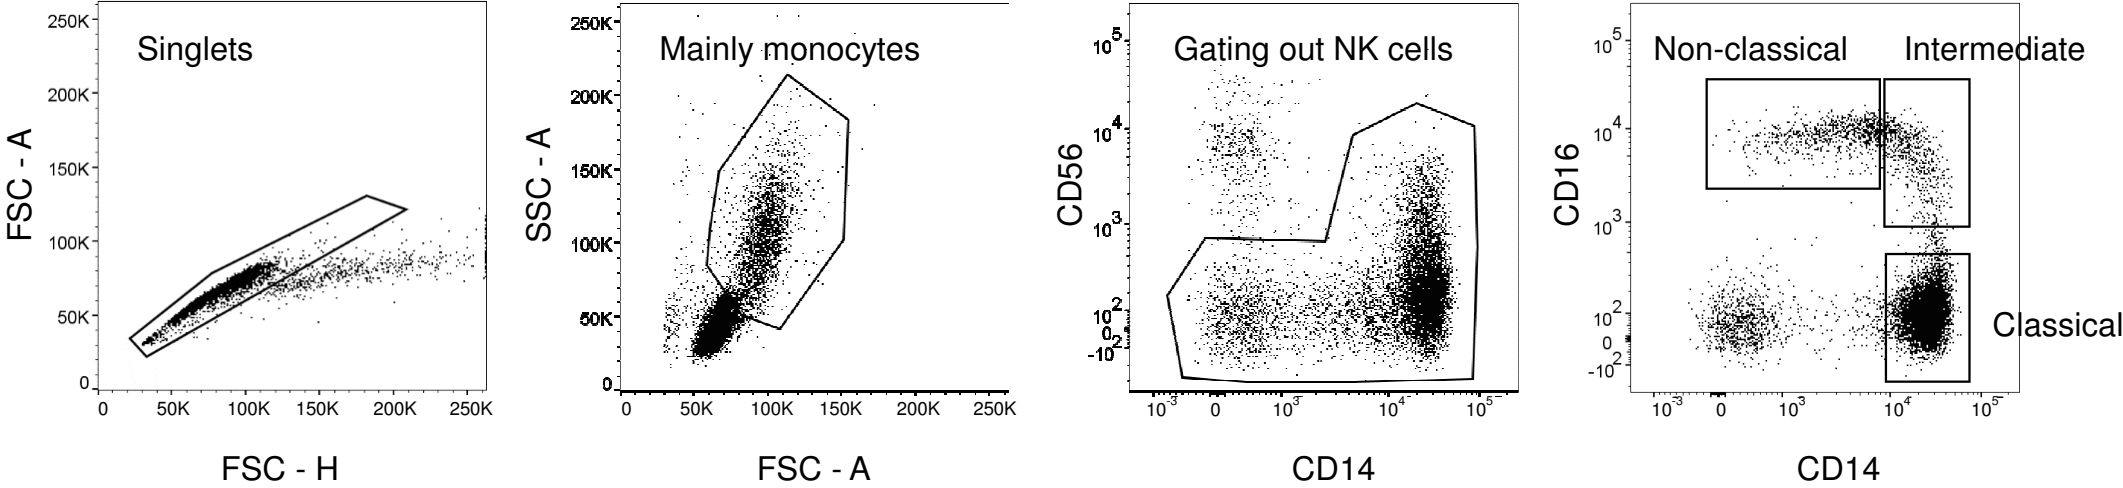

**Flow cytometry gating strategy.** Gating of total peripheral blood mononuclear cells (PBMCs) for analysis of the three monocyte subsets.

Supplementary Figure S2

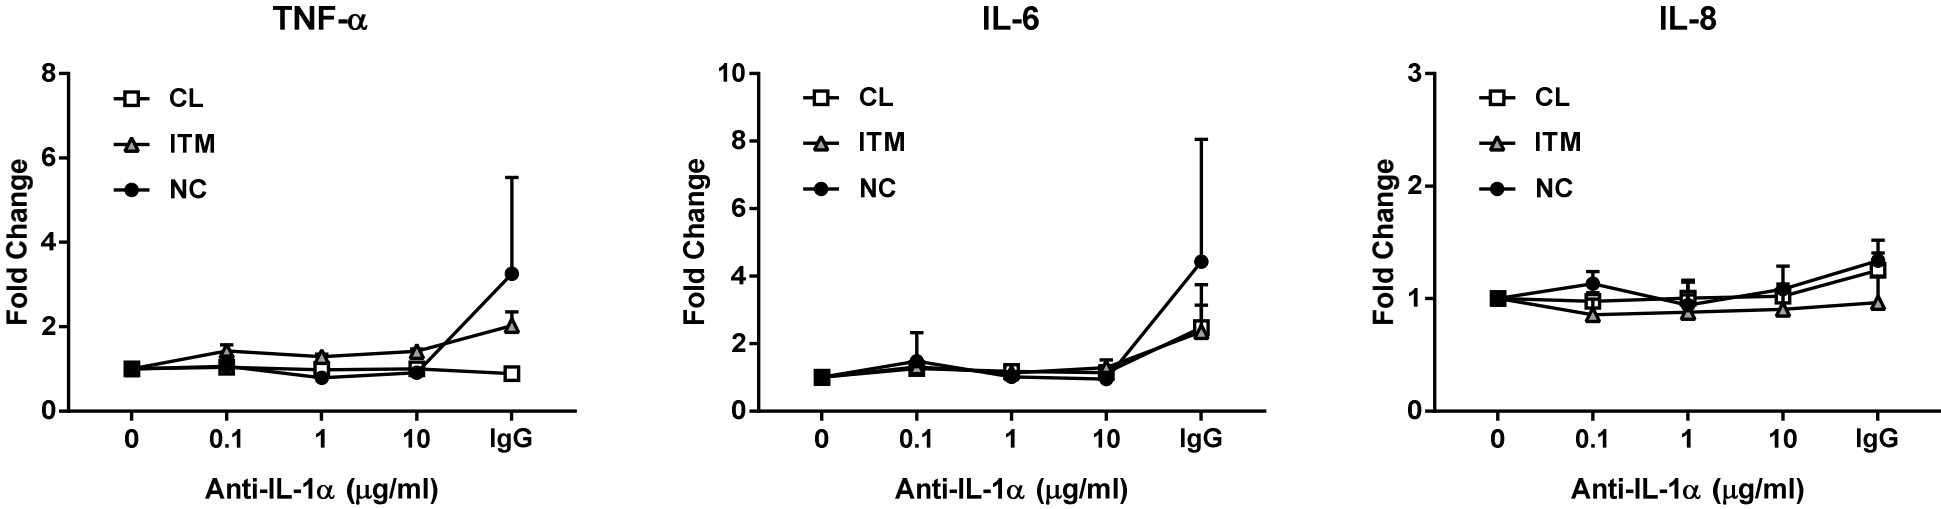

**Treatment with anti-IL-1α does not inhibit SASP in non-classical monocytes.** Fold change in secretion, with respect to no treatment, of TNF-α, IL-6 and IL-8 in the three monocyte subsets. Data represent the means ± SD; n = 3.

Supplementary Figure S3

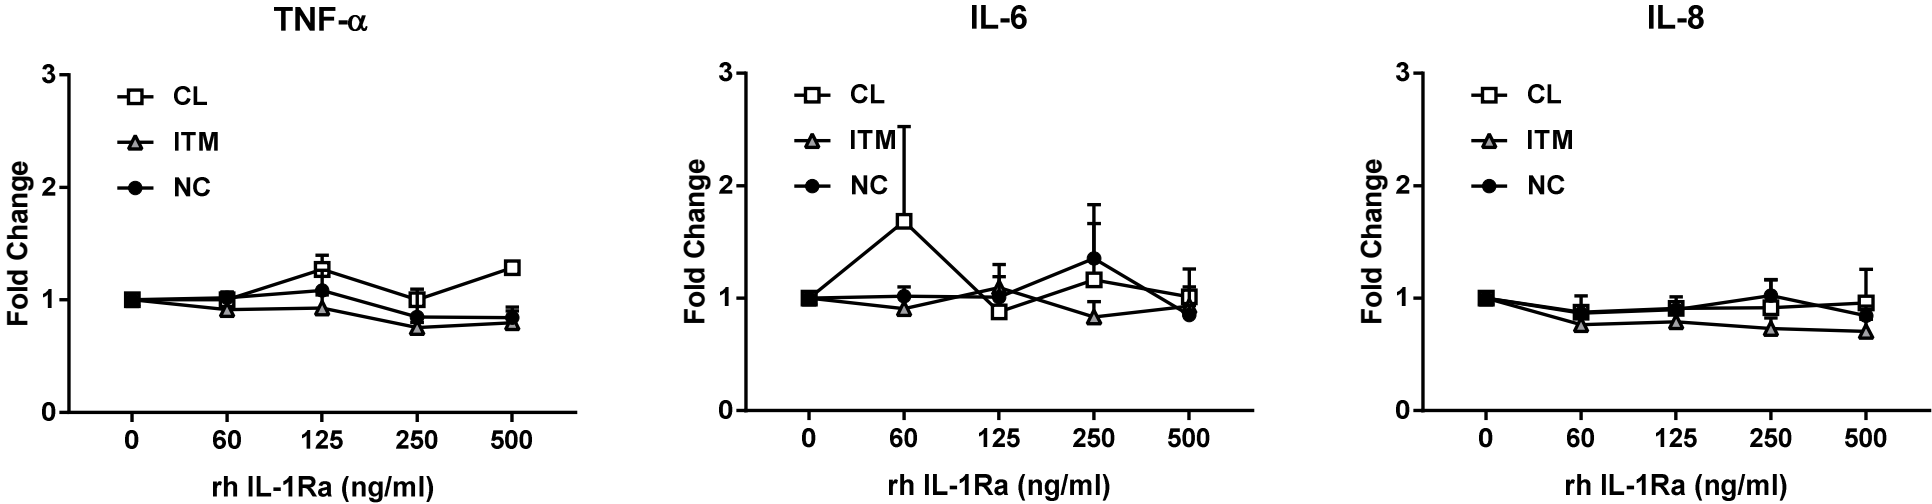

**Treatment with rh IL-1Ra does not inhibit the SASP in non-classical monocytes.** Fold change in secretion, with respect to no treatment, of TNF- $\alpha$ , IL-6 and IL-8 in the three monocyte subsets. Data represent the means  $\pm$  SD; n = 3.

Supplementary Figure S4

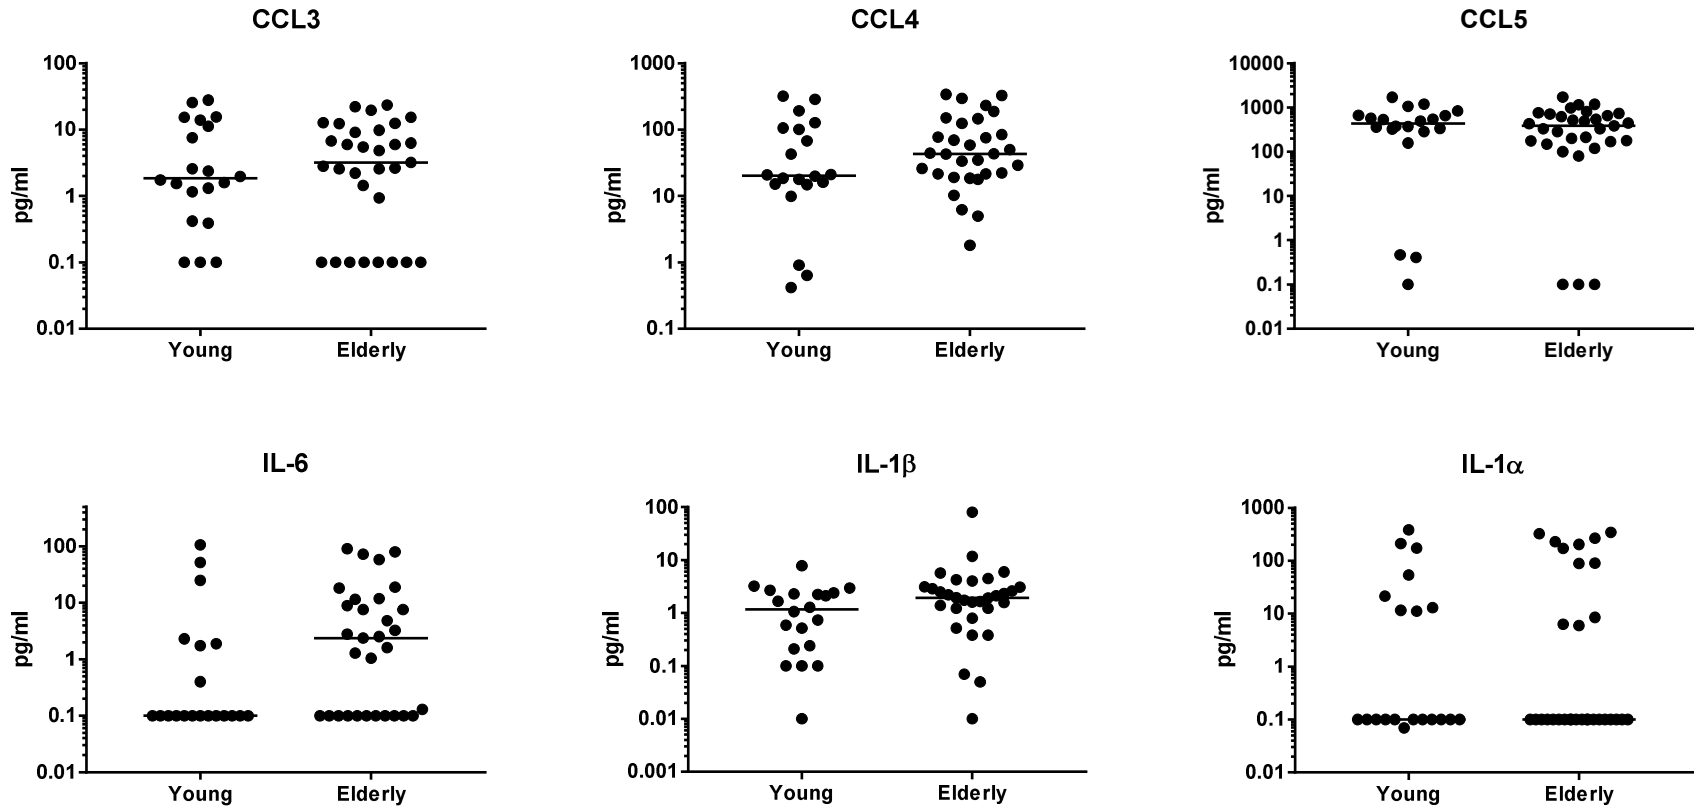

**Plasma levels of cytokines are higher in the elderly.** CCL3, CCL4, CCL5, IL-6 IL-1β and IL-1α levels in the plasma was analyzed by Luminex assay. Each dot represents one donor; line represents median; n = 20 for young, n = 30 for elderly.
